# Supplementary material for: A Comprehensive Study on Antibiotic Resistance among Coagulase-Negative Staphylococci (CoNS) Strains Isolated from Ready-to-Eat Food Served in Bars and Restaurants
Source: MDPI journal article supplement (doi:10.3390/foods12030514), 2023-01-23
Supplement: s1 [file s1]

**Table S1.** Primers used for screening of resistance determinants in *CoNS*.

| Antimicrobial   | Gene                          | Primer sequence 5'-3'                                           | Amplicon size (bp) | References |
|-----------------|-------------------------------|-----------------------------------------------------------------|--------------------|------------|
| Penicillin      | <i>blaZ</i>                   | F: CAAAGATGATATAGTTGCTTATTCTC<br>R: TGCTTGACCACTTTTATCAGC       | 400                | [1]        |
| Oxacillin       | <i>mecA</i>                   | F: AAAATCGATGGTAAAGGTTGGC<br>R: AGTTCTGGCACTACCGGATTTCG         | 533                | [2]        |
|                 | <i>mecC</i>                   | F: GAAAAAAGGCTTAGAACGCCTC<br>R: GAAGATCTTTCCGTTTTCAGC           | 138                | [3]        |
| Tetracycline    | <i>tetK</i>                   | F: TTATGGTGGTTGTAGCTAGAAA<br>R: AAAGGGTTAGAACTCTTGAAA           | 348                | [4]        |
|                 | <i>tetM</i>                   | F: GTGGACAAAGGTACAACGAG<br>R: CGGTAAAGTTCGTACACAC               | 406                | [5]        |
|                 | <i>tetL</i>                   | F: TGGTGAATGATAGCCATT<br>R: CAGGAATGACAGCACGCTAA                | 229                | [4]        |
| Fusidic acid    | <i>fusB</i>                   | F: CCGTCAAAGTTATTCAATCG<br>R: ACAATGAATGCTATCTCGACA             | 492                | [6]        |
|                 | <i>fusC</i>                   | F: GGACTTTATTACATCGATTGAC<br>R: CTGTCATAACAAATGTAATCTCC         | 411                |            |
|                 | <i>fusD</i>                   | F: AATTCGGTCAACGATCCC<br>R: GCCATCATTGCCAGTACG                  | 465                |            |
| Macrolides      | <i>msr(A/B)</i>               | F: TCCAATCATAGCACAAAATC<br>R: AATTCCTCTATTTGGTGGT               | 162                | [7]        |
|                 | <i>mph(C)</i>                 | F: ATGACTCGACATAATGAAAT<br>R: CTACTCTTTCATACCTAACTC             | 900                |            |
|                 | <i>ermA</i>                   | F: TCTAAAAAGCATGTAAAAGAA<br>R: CTTGATAGTTTATTAATATTAG           | 645                |            |
|                 | <i>ermB</i>                   | F: GAAAAGTACTCAACCAAATA<br>R: AGTAACGGTACTTAAATTGTTTA           | 639                |            |
|                 | <i>ermC</i>                   | F: TCAAAACATAATATAGATAAA<br>R: GCTAATATTGTTTAAATCGTCAAT         | 642                |            |
| Streptogramins  | <i>vga(A)</i>                 | F: AGTGGTGGTGAAGTAACACG<br>R: GGTTCAACTCAATCGACTGAG             | 1264               |            |
| Aminoglycosides | <i>aac(6')-Ie-aph(2'')-Ia</i> | F: CAGGAATTTATCGAAAATGGTAGAAAAG<br>R: CACAATCGACTAAAGAGTACCAATC | 369                | [8]        |
|                 | <i>aph(2'')-Ic</i>            | F: ATACAATCCGTCGAGTCGCT<br>R: GTTGGCCTTATCCTCTTCCA              | 837                | [9]        |
| Oxazolidinone   | <i>cfr</i>                    | F: TGAAGTATAAAGCAGGTTGGGAGTCA<br>R: ACCATATAATTGACCACAAGCAGC    | 746                | [10]       |
|                 | <i>rplC</i>                   | F: GCGCTTCATTTCGTGAATTCAA<br>R: TTCTTTCTGCATCGACACGTACAA        |                    | [11]       |
|                 | <i>rplD</i>                   | F: ACGATGCAATCGTAATGCAA<br>R: TTCAGCAACTTTTCTGACAA              |                    |            |
|                 | <i>rplV</i>                   | F: GGACATGCTGCTGACGATA<br>R: ACCATTTAGCATCCCAGTCG               |                    |            |
|                 | <i>oprA</i>                   | F: TACTTGATGAACCTACTAACCA<br>R: CCTTGAACACTGATTCTCGG            | 422                | [12]       |

**Table S2a.** Antibiotic resistance profiles in *Staphylococcus* spp. isolated from ready-to-eat food.

| Species                                  | Phenotyping resistance profiles           | Number (%) of strains | Number of antibiotics |
|------------------------------------------|-------------------------------------------|-----------------------|-----------------------|
| <i>S. carnosus</i> (n=9)                 | P, CN, QD, NOR*, E*, FOX, DA, RD, FD      | 1 (11.1)              | 9                     |
|                                          | P, QD*, E*, FOX, DA, RD, FD               | 1 (11.1)              | 7                     |
|                                          | P, FOX, DA*, FD                           | 1 (11.1)              | 4                     |
|                                          | E, FD                                     | 1 (11.1)              | 2                     |
|                                          | QD*                                       | 1 (11.1)              | 1                     |
|                                          | -                                         | 4 (44.4)              | 0                     |
| <i>S. epidermidis</i> (n=21)             | LZD, P, CN, QD, NOR*, E*, FOX, DA, RD, FD | 1 (4.8)               | 10                    |
|                                          | P, CN, QD*, NOR*, E*, FOX, DA, RD, FD     | 1 (4.8)               | 9                     |
|                                          | P, CN, QD, NOR*, E*, FOX, DA, RD, FD      | 1 (4.8)               | 8                     |
|                                          | P, CN, QD, E*, FOX, DA, RD                | 2 (9.5)               | 7                     |
|                                          | F, LZD, QD, E*, FOX, DA                   | 1 (4.8)               | 6                     |
|                                          | P, E*, FOX, DA, RD                        | 1 (4.8)               | 5                     |
|                                          | P, QD, E*, FOX, DA                        | 1 (4.8)               | 5                     |
|                                          | P, E, DA                                  | 1 (4.8)               | 3                     |
|                                          | P, E, FOX                                 | 1 (4.8)               | 3                     |
|                                          | E*, FOX, FD                               | 1 (4.8)               | 3                     |
|                                          | P, E*                                     | 1 (4.8)               | 2                     |
|                                          | P, FD                                     | 1 (4.8)               | 2                     |
|                                          | E, FD                                     | 3 (14.3)              | 1                     |
|                                          | E*                                        | 2 (9.5)               | 1                     |
|                                          | -                                         | 3 (14.3)              | 0                     |
| <i>S. haemolyticus</i> (n=4)             | P, CN, NOR*, E, FOX                       | 1 (25)                | 5                     |
|                                          | P, CN, QD*, FOX, FD                       | 1 (25)                | 5                     |
|                                          | P, NOR*, FOX, DA*                         | 1 (25)                | 4                     |
|                                          | P, TE, FD                                 | 1 (25)                | 3                     |
| <i>S. lentus</i> (n=2)                   | P                                         | 1 (50)                | 1                     |
|                                          | -                                         | 1 (50)                | 0                     |
| <i>S. lugdenensis</i> (n=1)              | P, CN, QD, FOX, RD, FD                    | 1 (100)               | 6                     |
| <i>S. pasteurii</i> (n=5)                | P, E, FOX, DA, RD, FD                     | 1 (20)                | 6                     |
|                                          | P, CN*, QD, E*, FOX, DA                   | 1 (20)                | 6                     |
|                                          | FD                                        | 2 (20)                | 1                     |
|                                          | P                                         | 1 (20)                | 1                     |
|                                          | E                                         | 1 (20)                | 1                     |
| <i>S. petrasii subsp. petrasii</i> (n=4) | P, CN, QD, FOX, DA                        | 1 (25)                | 5                     |
|                                          | F, C*                                     | 1 (25)                | 2                     |
|                                          | C                                         | 1 (25)                | 1                     |
|                                          | -                                         | 1 (25)                | 0                     |
| <i>S. piscifermentans</i> (n=2)          | P, CN, QD, E*, FOX, DA                    | 1 (50)                | 6                     |
|                                          | FD                                        | 1 (50)                | 1                     |
| <i>S. saprophyticus</i> (n=6)            | P, E, FOX, DA, RD, FD                     | 1 (16.7)              | 6                     |
|                                          | P, QD, FOX, DA                            | 1 (16.7)              | 4                     |
|                                          | P, E*, DA                                 | 1 (16.7)              | 3                     |
|                                          | E, FD                                     | 1 (16.7)              | 2                     |
|                                          | P                                         | 1 (16.7)              | 1                     |
|                                          | -                                         | 1 (33.3)              | 0                     |
| <i>S. simulans</i> (n=9)                 | P, QD, E*, FOX, DA, RD                    | 1 (11.1)              | 6                     |
|                                          | P, CN*, FOX, RD*, FD                      | 1 (11.1)              | 5                     |
|                                          | P, FD                                     | 1 (11.1)              | 2                     |
|                                          | TE*                                       | 1 (11.1)              | 1                     |
|                                          | P                                         | 2 (22.2)              | 1                     |
|                                          | -                                         | 4 (44.4)              | 0                     |

|                          |                                   |          |   |
|--------------------------|-----------------------------------|----------|---|
| <i>S. warneri</i> (n=14) | LZD, P, C, CN, QD, E, FOX, DA, RD | 1 (7.1)  | 9 |
|                          | P, CN, QD*, E*, FOX, DA, RD       | 1 (7.1)  | 7 |
|                          | P, CN, QD, NOR*, E*, FOX, DA      | 1 (7.1)  | 7 |
|                          | P, CN, QD, FOX, DA                | 1 (7.1)  | 5 |
|                          | P, E, DA*                         | 1 (7.1)  | 3 |
|                          | P, TE                             | 1 (7.1)  | 2 |
|                          | P                                 | 2 (14.9) | 1 |
|                          | FD                                | 2 (14.9) | 1 |
|                          | -                                 | 4 (28.6) | 0 |
| <i>S. xylosus</i> (n=8)  | P, CN, QD, NOR*, E*, FOX, DA, RD  | 1 (12.5) | 8 |
|                          | LZD, P, CN, QD, NOR*, E*, FOX, DA | 1 (12.5) | 8 |
|                          | P, DA*, FD                        | 1 (12.5) | 3 |
|                          | P                                 | 1 (12.5) | 1 |
|                          | -                                 | 4 (50)   | 0 |

Abbreviations: \*intermediate resistance; n= number of MR-CoNS isolated; penicillin (P-10U) - penicillinase, cefoxitin (FOX-30 µg) - penicillinase, gentamicin (CN-10 µg) - aminoglycosides, erythromycin (E-15 µg) - macrolides, tetracycline (TE30 µg) - tetracyclines, ciprofloxacin (CIP-5 µg) - fluoroquinolones, nitrofurantoin (F-300 µg) - nitrofurantoin, clindamycin (DA-2 µg) - lincosamides, trimethoprim/sulfamethoxazole (SXT-1.25/23.75 µg) - folate pathway inhibitors, chloramphenicol (C-30 µg) - phenicols, rifampin (RD-5 µg) - ansamycins, quinupristin/dalfopristin (QD-15 µg) – streptogramins and linezolid (LZD-30 µg) – oxazolidin

**Table S2b.** Antibiotic resistance profiles of multidrug-resistant CoNS isolated from ready-to-eat food.

| Species                                  | Phenotyping resistance profiles           | Number (%) of strains | Number of antibiotics |
|------------------------------------------|-------------------------------------------|-----------------------|-----------------------|
| <i>S. carnosus</i> (n=3)                 | P, CN, QD, NOR*, E*, FOX, DA, RD, FD      | 1 (33.3)              | 9                     |
|                                          | P, QD*, E*, FOX, DA, RD, FD               | 1 (33.3)              | 7                     |
|                                          | P, FOX, DA*, FD                           | 1 (33.3)              | 4                     |
| <i>S. epidermidis</i> (n=9)              | LZD, P, CN, QD, NOR*, E*, FOX, DA, RD, FD | 1 (11.1)              | 10                    |
|                                          | P, CN, QD*, NOR*, E*, FOX, DA, RD, FD     | 1 (11.1)              | 9                     |
|                                          | P, CN, QD, NOR*, E*, FOX, DA, RD, FD      | 1 (11.1)              | 9                     |
|                                          | P, CN, QD, E*, FOX, DA, RD, FD            | 1 (11.1)              | 8                     |
|                                          | F, LZD, QD, E*, FOX, DA                   | 1 (11.1)              | 6                     |
|                                          | P, E*, FOX, DA, RD                        | 1 (11.1)              | 5                     |
|                                          | P, QD, E*, FOX, DA                        | 1 (11.1)              | 5                     |
|                                          | P, E*, FOX, DA, RD                        | 1 (11.1)              | 5                     |
|                                          | E*, FOX, FD                               | 1 (11.1)              | 3                     |
|                                          | P, E, FOX                                 | 1 (11.1)              | 3                     |
| <i>S. heamolyticus</i> (n=3)             | P, CN, QD*, FOX, FD                       | 1 (33.3)              | 5                     |
|                                          | P, CN, NOR*, E, FOX                       | 1 (33.3)              | 5                     |
|                                          | P, NOR*, FOX, DA*                         | 1 (33.3)              | 4                     |
| <i>S. lugdenensis</i> (n=1)              | P, CN, QD, FOX, RD, FD                    | 1 (100)               | 6                     |
| <i>S. pasteurii</i> (n=2)                | P, CN*, QD, E*, FOX, DA                   | 1(50)                 | 6                     |
|                                          | P, E, FOX, DA, RD, FD                     | 1(50)                 | 5                     |
| <i>S. petrasii subsp. petrasii</i> (n=1) | P, CN, QD, FOX, DA                        | 1 (100)               | 5                     |
| <i>S. piscifermentans</i> (n=1)          | P, CN, QD, E*, FOX, DA                    | 1 (100)               | 6                     |
| <i>S. saprophyticus</i> (n=2)            | P, E, FOX, DA, RD                         | 1(50)                 | 5                     |
|                                          | P, QD, FOX, DA                            | 1(50)                 | 4                     |
| <i>S. simulans</i> (n=2)                 | P, QD, E*, FOX, DA, RD, FD                | 1(50)                 | 7                     |
|                                          | P, CN*, FOX, RD*, FD                      | 1(50)                 | 5                     |
| <i>S. warneri</i> (n=4)                  | P, CN, QD, FOX, DA                        | 1(25)                 | 5                     |
|                                          | P, CN, QD, NOR*, E*, FOX, DA              | 1(25)                 | 7                     |
|                                          | P, CN, QD*, E*, FOX, DA, RD               | 1(25)                 | 7                     |
|                                          | LZD, P, C, CN, QD, E, FOX, DA, RD         | 1(25)                 | 9                     |
| <i>S. xylosoyus</i> (n=2)                | P, CN, QD, NOR*, E*, FOX, DA, RD          | 1(50)                 | 8                     |
|                                          | LZD, P, CN, QD, NOR*, E*, FOX, DA         | 1(50)                 | 8                     |

Abbreviations: \*intermediate resistance; n= number of MR-CoNS isolated; penicillin (P-10U) - penicillinase, cefoxitin (FOX-30 µg) - penicillinase, gentamicin (CN-10 µg) - aminoglycosides, erythromycin (E-15 µg) - macrolides, tetracycline (TE30 µg) - tetracyclines, ciprofloxacin (CIP-5 µg) - fluoroquinolones, nitrofurantoin (F-300 µg) - nitrofurantoin, clindamycin (DA-2 µg) - lincosamides, trimethoprim/sulfamethoxazole (SXT-1.25/23.75 µg) - folate pathway inhibitors, chloramphenicol (C-30 µg) - phenicols, rifampin (RD-5 µg) - ansamycins, quinupristin/dalfopristin (QD-15 µg) - streptogramins and linezolid (LZD-30 µg) - oxazolidino

**Table S3.** Percentage of *Staphylococcus* spp. strains resistant to different antibiotics.

| Antimicrobial agent |     |            | <i>Staphylococcus</i> sp. (n=85) |       |       |       |
|---------------------|-----|------------|----------------------------------|-------|-------|-------|
|                     |     |            | R (n)                            | R (%) | S (n) | S (%) |
| Penicillin          | P   | 10         | 48                               | 55.8  | 37    | 43.5  |
| Erythromy-          | E   | 15         | 34                               | 40.0  | 51    | 60.0  |
| Cefoxitin           | FOX | 30         | 31                               | 36.5  | 54    | 62.8  |
| Clindamy-           | DA  | 2          | 29                               | 34.1  | 56    | 65.9  |
| Fusidic acid        | FD  | 10         | 24                               | 28.2  | 61    | 71.8  |
| Quinupris-          | QD  | 15         | 21                               | 24.7  | 64    | 75.3  |
| Gentamicin          | CN  | 120        | 19                               | 22.4  | 66    | 77.6  |
| Rifampicin          | RD  | 5          | 16                               | 18.8  | 69    | 81.1  |
| Linezolid           | LZD | 30         | 3                                | 3.5   | 82    | 96.5  |
| Chloram-            | C   | 30         | 3                                | 3.5   | 82    | 96.5  |
| Tetracycline        | T   | 30         | 3                                | 3.5   | 82    | 96.5  |
| Nitrofu-            | F   | 300        | 1                                | 1.2   | 84    | 98.8  |
| Ciproflox-          | CIP | 5          | 0                                | 0     | 85    | 100   |
| Trime-              |     |            |                                  |       |       |       |
| thoprim/sul-        | SXT | 1.25/23.75 | 0                                | 0     | 85    | 100   |
| famethoxa-          |     |            |                                  |       |       |       |
| zole                |     |            |                                  |       |       |       |

**Table S4.** Results of antibiotic resistance genes presence depending on the species.

| Species                            | No. of isolates | Number (%) of strains |                  |                  |                  |                 |                  |                  |                 |                                 |                 |                  |                |
|------------------------------------|-----------------|-----------------------|------------------|------------------|------------------|-----------------|------------------|------------------|-----------------|---------------------------------|-----------------|------------------|----------------|
|                                    |                 | <i>blaZ</i>           | <i>mecA</i>      | <i>nuc</i>       | <i>tetK</i>      | <i>tetL</i>     | <i>tetM</i>      | <i>ermB</i>      | <i>msrA/B</i>   | <i>aac (6')-Ie aph (2'')-Ia</i> | <i>fusB/C/D</i> | <i>vgaA</i>      | <i>mphC</i>    |
| <i>S. epidermidis</i>              | 21              | 17 (81.0)             | 11 (52.4)        | 13 (61.9)        | 7 (33.3)         | 2 (9.5)         | 3 (14.9)         | 11 (52.4)        | 15 (71.4)       | 11 (52.4)                       | 5 (23.8)        | 7 (33.3)         | 3 (14.9)       |
| <i>S. warneri</i>                  | 14              | 13 (92.9)             | 1 (7.1)          | 9 (64.3)         | 6 (42.9)         | 0               | 1 (7.1)          | 3 (21.4)         | 6 (42.9)        | 7 (50)                          | 2 (14.3)        | 4 (28.6)         | 0              |
| <i>S. carnosus</i>                 | 9               | 9 (100)               | 3 (22.2)         | 9 (100)          | 5 (55.5)         | 0               | 2 (22.2)         | 6 (66.7)         | 8 (88.9)        | 5 (55.5)                        | 2 (22.2)        | 3 (33.3)         | 1 (11.1)       |
| <i>S. simulans</i>                 | 9               | 6 (66.7)              | 0                | 0                | 1 (11.1)         | 0               | 2 (22.2)         | 1 (11.1)         | 6 (66.7)        | 3 (33.3)                        | 3 (33.3)        | 5 (55.6)         | 0              |
| <i>S. xylosus</i>                  | 8               | 8 (100)               | 1 (12.5)         | 6 (75.0)         | 0                | 0               | 0                | 3 (37.5)         | 5 (62.5)        | 5 (62.5)                        | 1 (12.5)        | 2 (25)           | 0              |
| <i>S. saprophyticus</i>            | 6               | 4 (66.7)              | 1 (16.7)         | 5 (83.3)         | 3 (50)           | 0               | 5 (83.3)         | 0                | 5 (83.3)        | 2 (33.3)                        | 0               | 2 (33.3)         | 0              |
| <i>S. pasteurii</i>                | 5               | 5 (100)               | 2 (40.0)         | 3 (60.0)         | 2 (40)           | 0               | 1 (20)           | 2 (40)           | 2 (40)          | 0                               | 0               | 0                | 0              |
| <i>S. heamolyticus</i>             | 4               | 3 (75.0)              | 3 (75.0)         | 1 (25.0)         | 1 (25)           | 0               | 0                | 2 (50)           | 4 (100)         | 2 (50)                          | 1 (25)          | 0                | 0              |
| <i>S. petrasii subsp. petrasii</i> | 4               | 4 (100)               | 2 (50.0)         | 4 (100)          | 2 (50)           | 0               | 0                | 3 (75)           | 4 (100)         | 2 (50)                          | 0               | 0                | 0              |
| <i>S. lentus</i>                   | 2               | 2 (100)               | 1 (50.0)         | 0                | 0                | 0               | 0                | 1 (50)           | 1(50)           | 1 (50)                          | 0               | 0                | 0              |
| <i>S. piscifermentas</i>           | 2               | 1 (50.0)              | 0                | 1 (50.0)         | 0                | 0               | 0                | 2 (100)          | 2 (100)         | 0                               | 1 (50.0)        | 0                | 0              |
| <i>S. lugdenensis</i>              | 1               | 0                     | 0                | 1 (100)          | 0                | 0               | 0                | 0                | 0               | 0                               | 0               | 0                | 0              |
| <b>Total</b>                       | <b>85</b>       | <b>72 (84.7)</b>      | <b>25 (29.4)</b> | <b>53 (62.4)</b> | <b>27 (31.8)</b> | <b>2 (2.35)</b> | <b>14 (16.5)</b> | <b>34 (40.0)</b> | <b>58(68.2)</b> | <b>39 (45.9)</b>                | <b>15(17.6)</b> | <b>26 (30.6)</b> | <b>4 (4.7)</b> |

1. Kaase, M., Lenga, S., Friedrich, S., Szabados, F., Sakinc, T., Kleine, B., & Gatermann, S. G. (2008). Comparison of phenotypic methods for penicillinase detection in *Staphylococcus aureus*. *Clinical Microbiology and Infection*, 14(6), 614–616. <https://doi.org/10.1111/j.1469-0691.2008.01997.x>
2. Barski, P., Piechowicz, L., Galiński, J., & Kur, J. (1996). Rapid assay for detection of methicillin-resistant *Staphylococcus aureus* using multiplex PCR. *Molecular and Cellular Probes*, 10(6), 471–475. <https://doi.org/10.1006/mcpr.1996.0066>
3. Nelli, A.; Voidarou, C.; Venardou, B.; Fotou, K.; Tsinas, A.; Bonos, E.; Fthenakis, G.C.; Skoufos, I.; Tzora, A. Antimicrobial and Methicillin Resistance Pattern of Potential Mastitis-Inducing *Staphylococcus aureus* and Coagulase-Negative Staphylococci Isolates from the Mammary Secretion of Dairy Goats. *Biology* **2022**, 11, 1591. <https://doi.org/10.3390/biology11111591>
4. Gevers, D., Danielsen, M., Huys, G., & Swings, J. (2003). Molecular characterization of tet(M) genes in *Lactobacillus* isolates from different types of fermented dry sausage. *Applied and Environmental Microbiology*, 69(2), 1270–1275. <https://doi.org/10.1128/AEM.69.2.1270-1275.2003>
5. Roberts, M. C. (1994). Epidemiology of tetracycline-resistance determinants. *Trends in Microbiology*, 2(10), 353–357. [https://doi.org/10.1016/0966-842X\(94\)90610-6](https://doi.org/10.1016/0966-842X(94)90610-6)
6. Hritcu, O. M., Schmidt, V. M., Salem, S. E., Maciucă, I. E., Moraru, R. F., Lipovan, I., Mareş, M., Solcan, G., & Timofte, D. (2020). Geographical Variations in Virulence Factors and Antimicrobial Resistance Amongst *Staphylococci* Isolated From Dogs From the United Kingdom and Romania. *Frontiers in Veterinary Science*, 7(July), 1–10. <https://doi.org/10.3389/fvets.2020.00414>
7. Silva, V., Caniça, M., Ferreira, E., Vieira-Pinto, M., Saraiva, C., Pereira, J. E., Capelo, J. L., Igrejas, G., & Poeta, P. (2022). Multidrug-Resistant Methicillin-Resistant Coagulase-Negative *Staphylococci* in Healthy Poultry Slaughtered for Human Consumption. 11, 365. <https://doi.org/10.3390/antibiotics11030365>
8. Padmasini, E., Padmaraj, R., & Ramesh, S. S. (2014). High level aminoglycoside resistance and distribution of aminoglycoside resistant genes among clinical isolates of *Enterococcus* species in Chennai, India. *The Scientific World Journal*, 2014. <https://doi.org/10.1155/2014/329157>
9. Kobayashi, N., Mahbub Alam, M., Nishimoto, Y., Urasawa, S., Uehara, N., & Watanabe, N. (2001). Distribution of aminoglycoside resistance genes in recent clinical isolates of *Enterococcus faecalis*, *Enterococcus faecium* and *Enterococcus avium*. *Epidemiology and Infection*, 126(2), 197–204. <https://doi.org/10.1017/S0950268801005271>
10. Kehrenberg C., Cuny C., Strommenger B., Schwarz S., Witte W. (2009). Methicillin-resistant and -susceptible *Staphylococcus aureus* strains of clonal lineages ST398 and ST9 from swine carry the multidrug resistance gene *cfr*. *Antimicrob. Agents Chemother.* 53 779–781. [10.1128/aac.01376-08-1378](https://doi.org/10.1128/aac.01376-08-1378)
11. Mališová, L.; Jakubů, V.; Pomorská, K.; Musílek, M.; Žemličková, H. Spread of Linezolid-Resistant *Enterococcus* spp. in Human Clinical Isolates in the Czech Republic. *Antibiotics* **2021**, 10, 219
12. Brenciani, A.; Morroni, G.; Vincenzi, C.; Manso, E.; Mingoia, M.; Giovanetti, E.; Varaldo, P.E. Detection in Italy of two clinical *Enterococcus faecium* isolates carrying both the oxazolidinone and phenicol resistance gene *optrA* and a silent multiresistance gene *cfr*. *J. Antimicrob. Chemother.* **2016**, 71, 1118–1119.
